# Supplementary material for: Molecular Modeling and Structural Stability of Wild-Type and Mutant CYP51 from Leishmania major: In Vitro and In Silico Analysis of a Laboratory Strain
Source: PubMed Central journal article supplement (PMC6017637; doi:10.3390/molecules23030696), 2018-03-19
Supplement: molecules-23-00696-s001.pdf [file molecules-23-00696-s001.pdf]

## Supplementary Material

# Molecular Modeling and Structural Stability of Wild-Type and Mutant CYP51 from *Leishmania Major*: In Vitro and In Silico Analysis of a Laboratory Strain

Masoud Keighobadi <sup>1</sup>, Saeed Emami <sup>2,\*</sup>, Milad Lagzian <sup>3</sup>, Mahdi Fakhar <sup>4,5</sup>, Alireza Rafiei <sup>5,6</sup> and Reza Valadan <sup>5,6,\*</sup>

<sup>1</sup> Pharmaceutical Sciences Research Center, Student Research Committee, Faculty of Pharmacy, Mazandaran University of Medical Sciences, Sari, 48157-33971, Iran; keighobadi216@yahoo.com

<sup>2</sup> Department of Medicinal Chemistry and Pharmaceutical Sciences Research Center, Faculty of Pharmacy, Mazandaran University of Medical Sciences, Sari, 48157-33971, Iran

<sup>3</sup> Department of Biology, Faculty of Science, University of Sistan and Baluchestan, Zahedan, 9816876578, Iran; m.lagzian@science.usb.ac.ir

<sup>4</sup> Department of Parasitology, Faculty of Medicine, Mazandaran University of Medical Sciences, Sari, 48157-33971, Iran; mahdif53@yahoo.com

<sup>5</sup> Molecular and Cell Biology Research Center (MCBRC), Faculty of Medicine, Mazandaran University of Medical Sciences, Sari, 48157-33971, Iran

<sup>6</sup> Department of Immunology, Faculty of Medicine, Mazandaran University of Medical Sciences, Sari, 48157-33971, Iran; rafiei1710@gmail.com

\* Correspondence: sd\_emami@yahoo.com (S.E.); rvaladan@mazums.ac.ir (R.V.); Tel.: +98-113-354-3082 (S.E.); +98-911-327-9036 (R.V.)

**Supplementary Table S1:** List of putative CYP51 sequences identified in different *Leishmania* species.

| Species                                | Accession number | Genomic region   | CDs size (bp) |
|----------------------------------------|------------------|------------------|---------------|
| <i>L. infantum</i>                     | NC_009395        | 453693 to 455135 | 1443          |
| <i>L. donovani</i>                     | NC_018238        | 456337 to 457779 | 1443          |
| <i>L. major</i> strain Friedlin        | NC_007252        | 464294 to 465733 | 1440          |
| <i>L. mexicana</i>                     | NC_018315        | 442773 to 444209 | 1440          |
| <i>L. braziliensis</i>                 | NC_009303        | 413210 to 414649 | 1440          |
| <i>L. panamensis</i>                   | NC_025856        | 467143 to 468582 | 1440          |
| <i>L. enrietti</i>                     | ATAF01000270     | 152371 to 153807 | 1440          |
| <i>L. tropica</i>                      | ATAT01001267     | 68292 to 69731   | 1440          |
| <i>L. arabica</i>                      | ATBH01000314     | 17025 to 18464   | 1440          |
| <i>L. gerbilli</i>                     | ATBK01000445     | 95610 to 97049   | 1440          |
| <i>L. turanica</i>                     | ATBU01000855     | 1011 to 2450     | 1440          |
| <i>L. amazonensis</i>                  | APNT01003038     | 2608 to 4047     | 1440          |
| <i>L. aethiopica</i>                   | AUMB01000834     | 3589 to 5028     | 1440          |
| <i>L. major</i> strain (MRHO/IR/75/ER) | KU843873         | 15 to 1454       | 1440          |
| <i>L. major</i> (wild-type Tork-245)   | KU843874         | 15 to 1454       | 1440          |

A

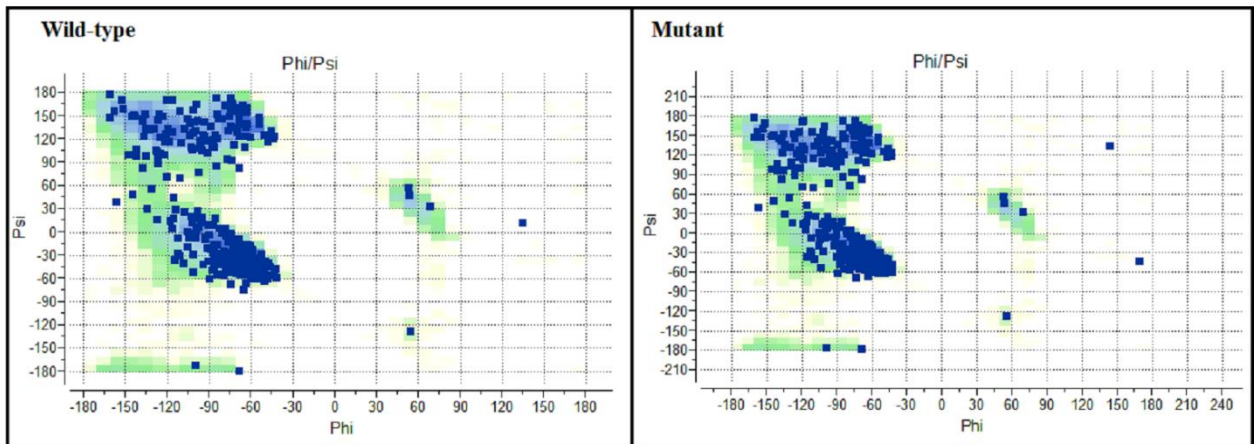

B

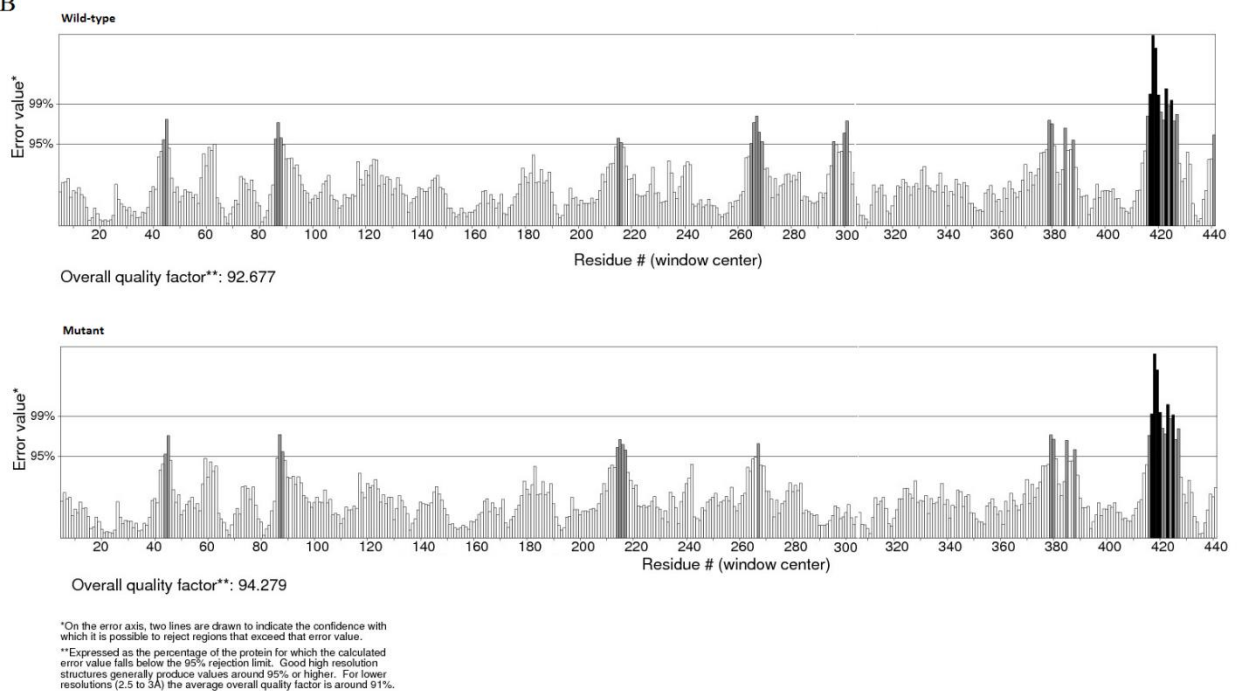

**Supplementary Figure S1:** Ramachandran plots for conformational model of CYP51 in wild-type and laboratory strain of *L. major*. The dark green regions contain the most favorable combinations of phi and psi while the light green regions indicate the allowed regions. The amino acids are shown with blue squares. B) ERRAT analysis (32) of wild-type and mutant structure showed that the overall quality factor for wild-type and mutant models were 92.677% and 94.279%, respectively.

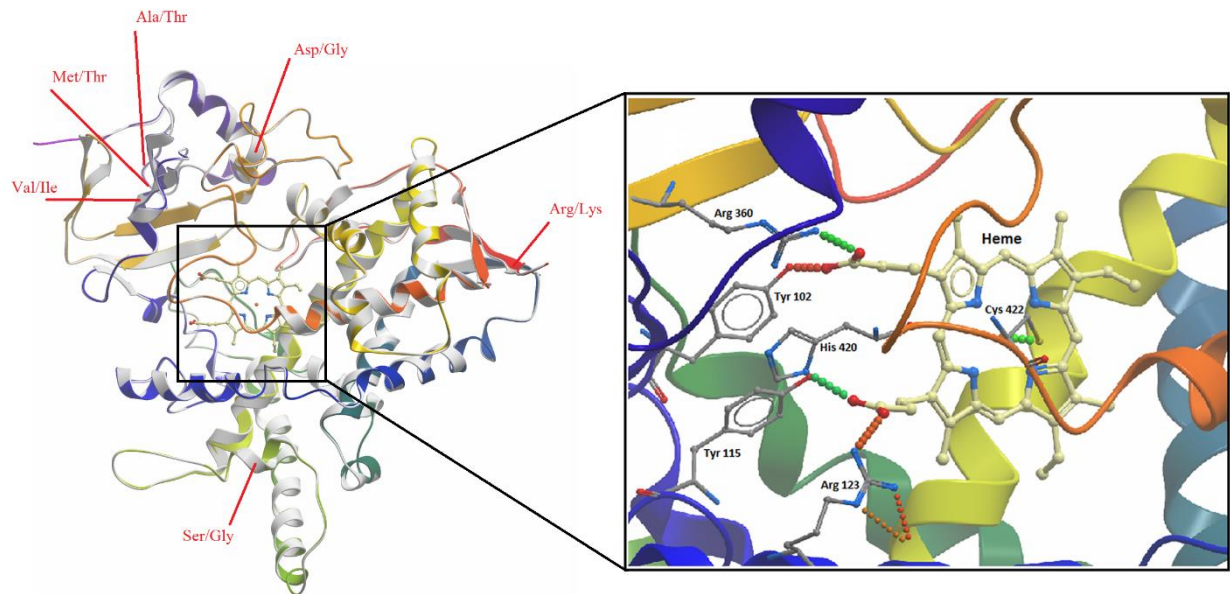

**Supplementary Figure S2:** Structural model of superimposed CYP51 from *L. infantum* (PDB code: 3L4D), wild-type and strain MRHO/IR/75/ER of *L. major*. (A) The three structures were superimposed. The position of non-synonymous mutations have been mapped on the structure with red lines. Different colors were used for better visualization of the secondary structures in the model (B) The porphyrin ring of heme structure was coordinated by hydrogen bonds with Tyr102, Tyr115, Arg123, Arg360 and His420 and the iron atom in the heme is linked to Cys422. The green and brown spheres indicates hydrogen bonds. The figure was generated by ICM-pro software.
